# Supplementary material
Source: ML conference proceedings conference paper supplement (https://proceedings.neurips.cc/paper_files/paper/2016/hash/0771fc6f0f4b1d7d1bb73bbbe14e0e31-Abstract.html)

A.

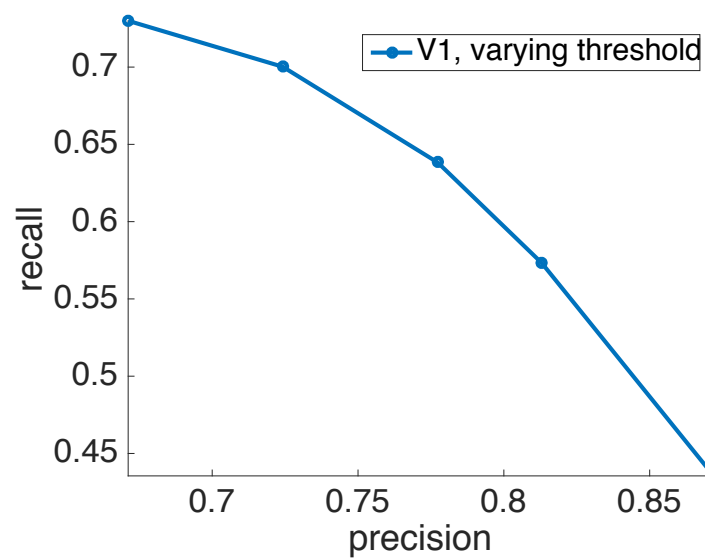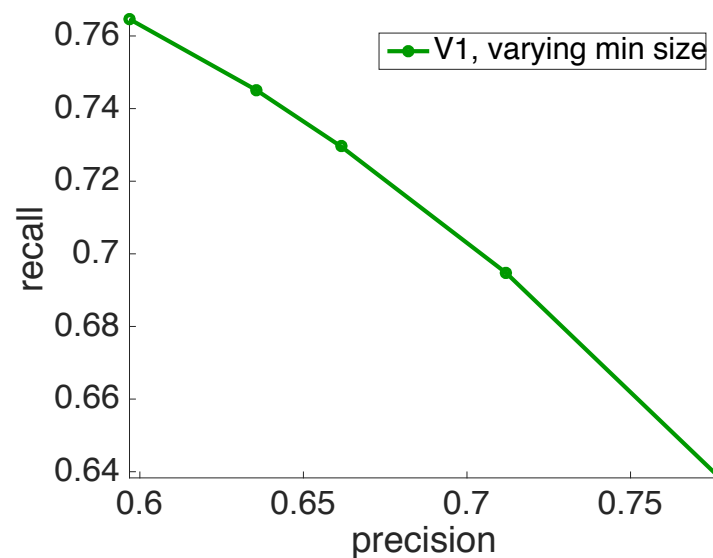

B.

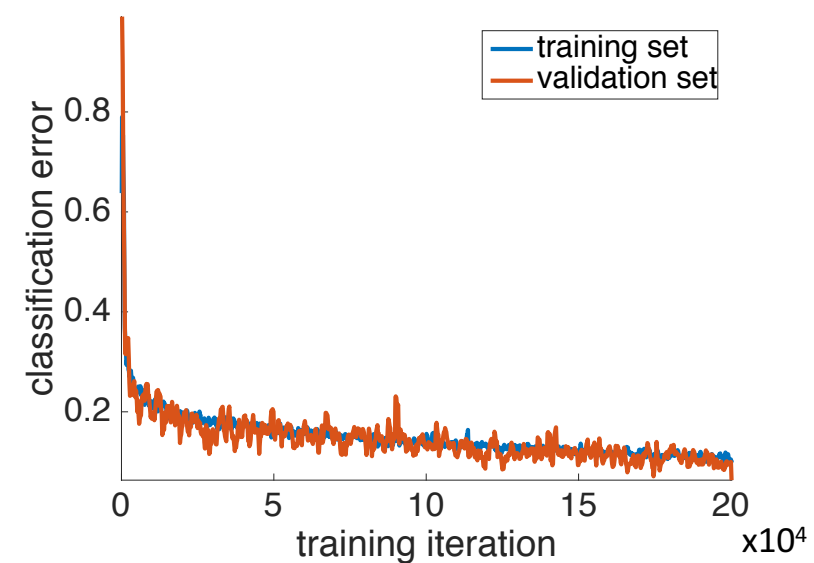

C.

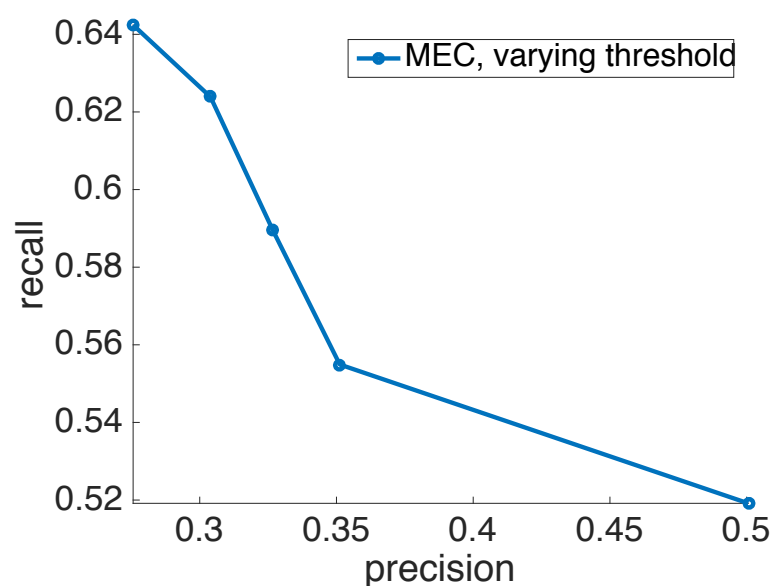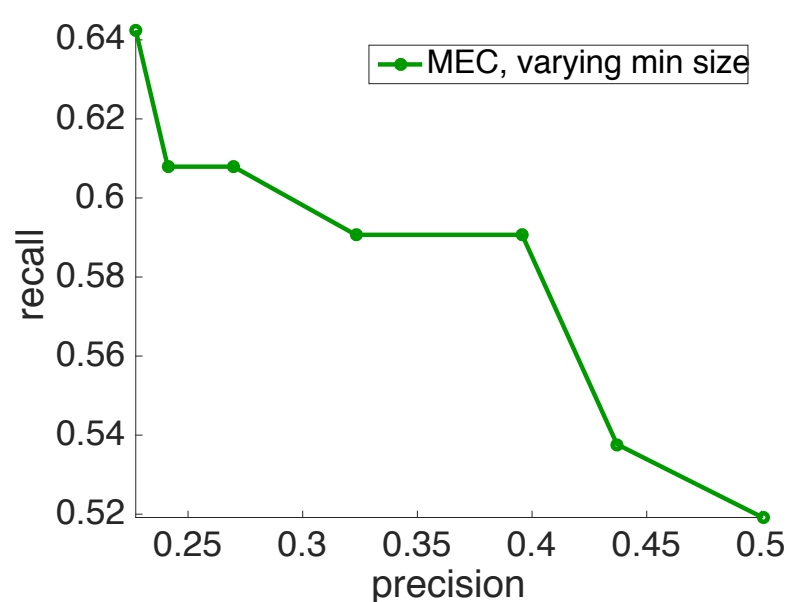

D.

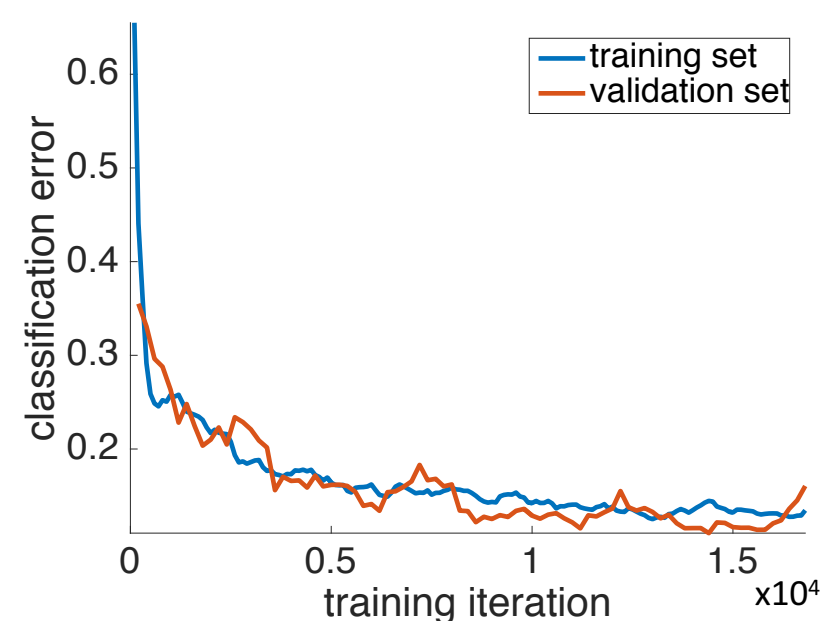

**Supplementary Fig 1.** Precision/recall tradeoff during post-processing, and training loss curves. **A)** Recall vs. precision parameterized over post-processing intensity threshold and minimum neuron size, respectively, for (2+1)D network on V1 dataset. **B)** Pixel classification error across training iterations for (2+1)D network on V1 dataset. **C-D)** Same as A and B, but for MEC dataset. **E)** Pixel classification error across training iterations for 2D network on V1 dataset.

E.

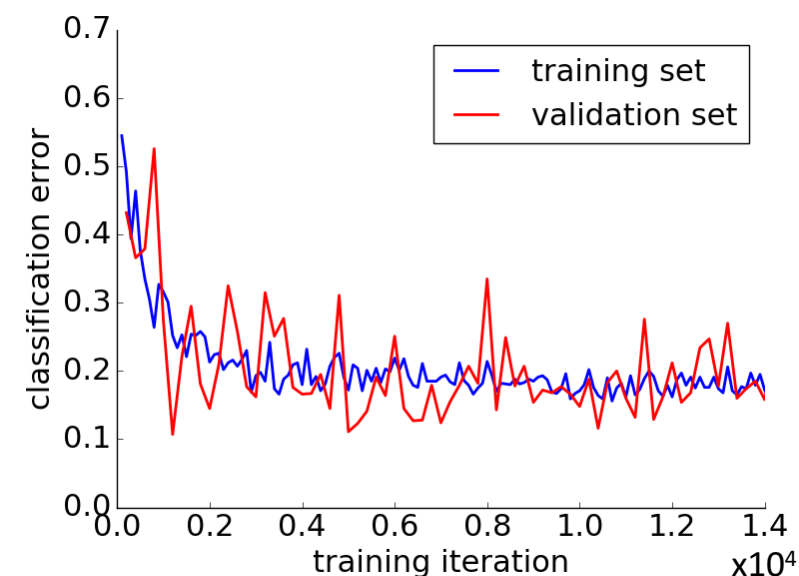

Supplement: Supplementary file [file 0771fc6f0f4b1d7d1bb73bbbe14e0e31-Supplemental.zip]
